# Supplementary material for: Single Cell Kinetics of Phenotypic Switching in the Arabinose Utilization System of E. coli
Source: PubMed Central journal article supplement (PMC3935871; doi:10.1371/journal.pone.0089532), 2014-02-26

**A** native *araE* regulation ( $P_E$ -*araE*)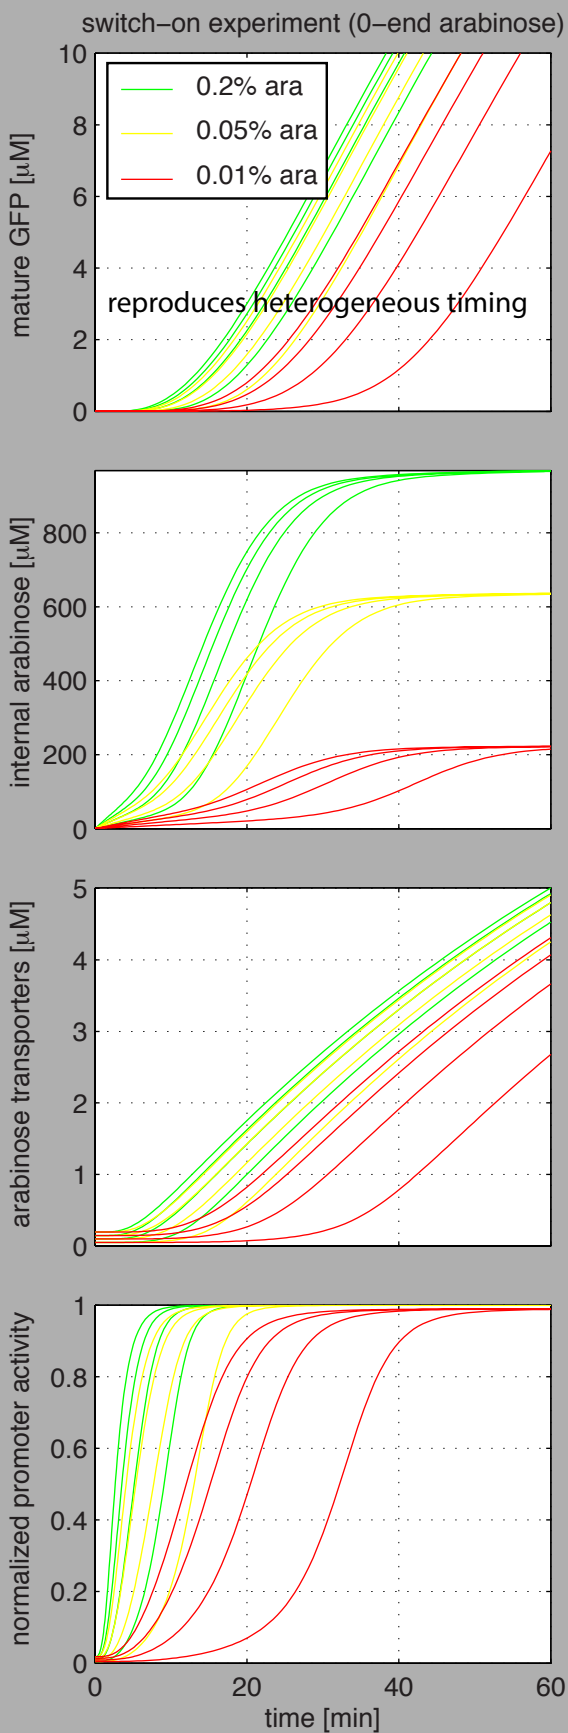**B** native *araE* regulation ( $P_E$ -*araE*)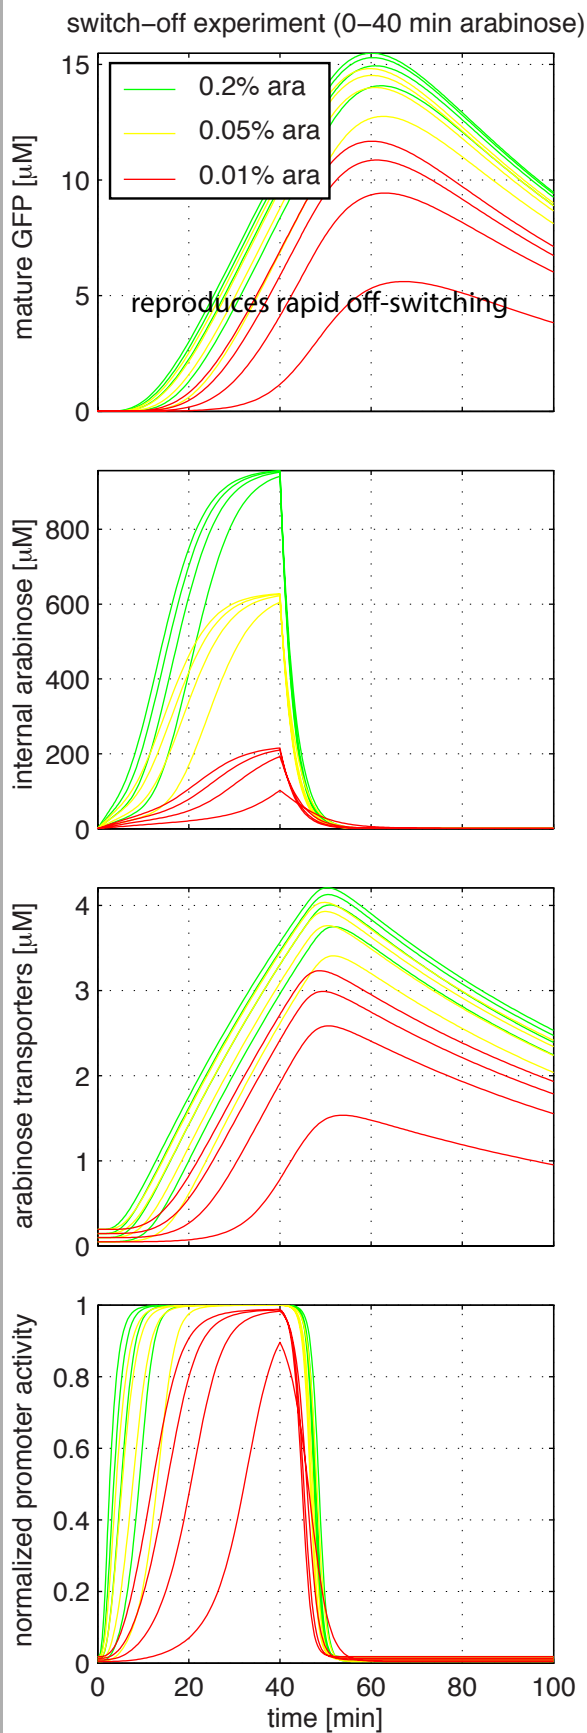**C** constitutive *araE* expression ( $P_{lac}$ -*araE*)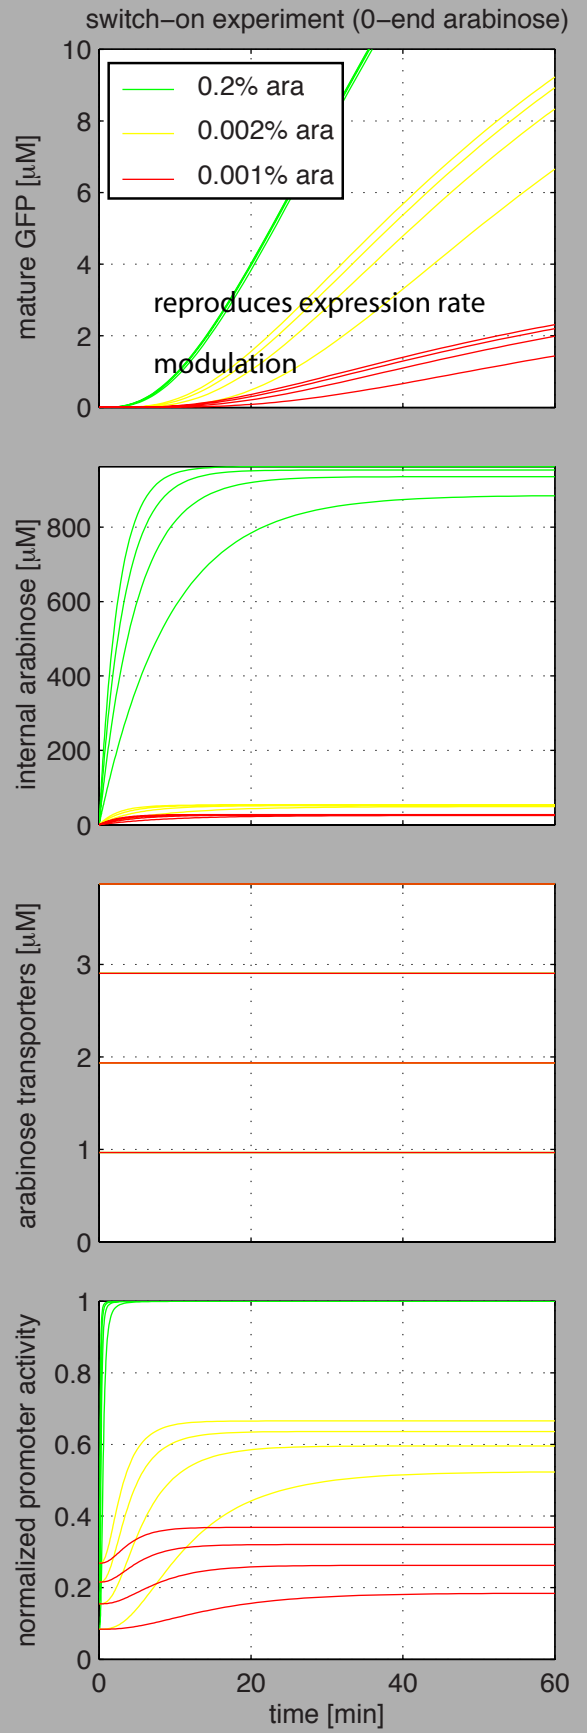

Supplement: pone.0089532.s008.pdf [file pone.0089532.s008.pdf]
