# Supplementary material for: Single Cell Kinetics of Phenotypic Switching in the Arabinose Utilization System of E. coli
Source: PubMed Central journal article supplement (PMC3935871; doi:10.1371/journal.pone.0089532), 2014-02-26

0.2 % arabinose

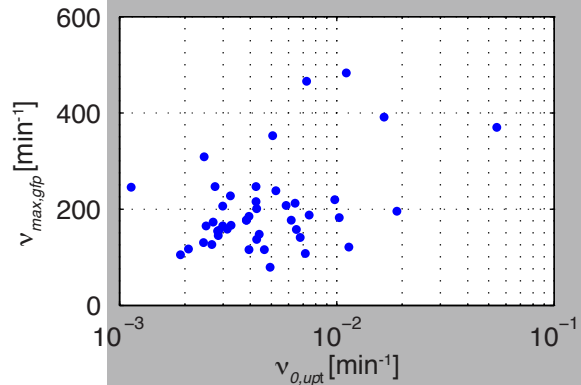

0.002 % arabinose

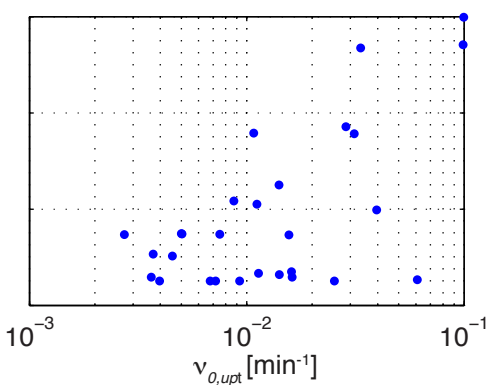

0.001 % arabinose

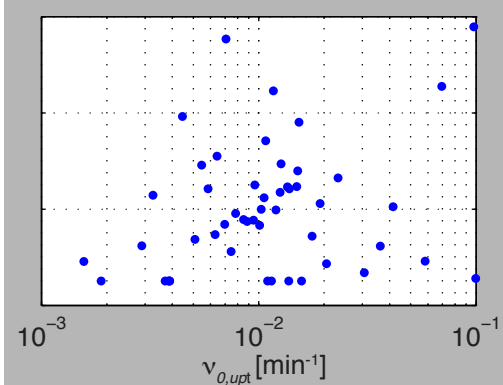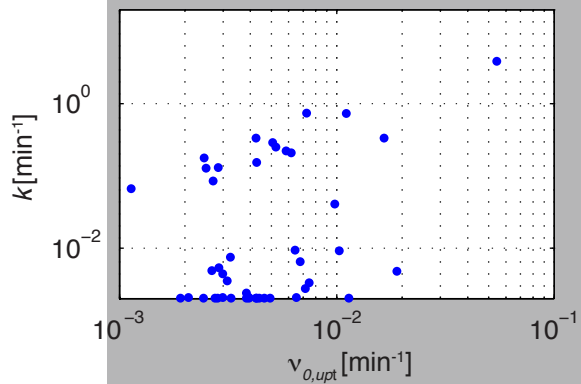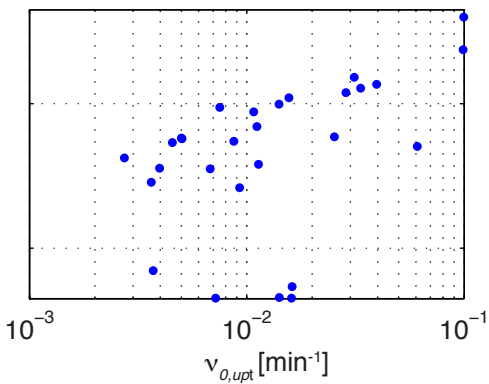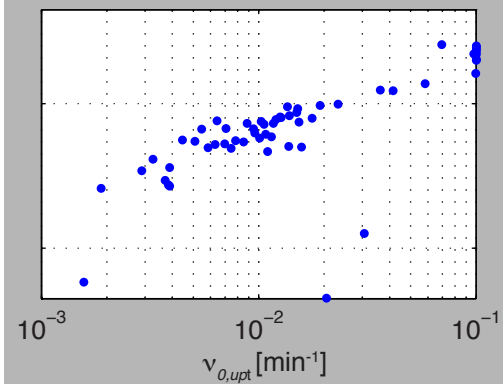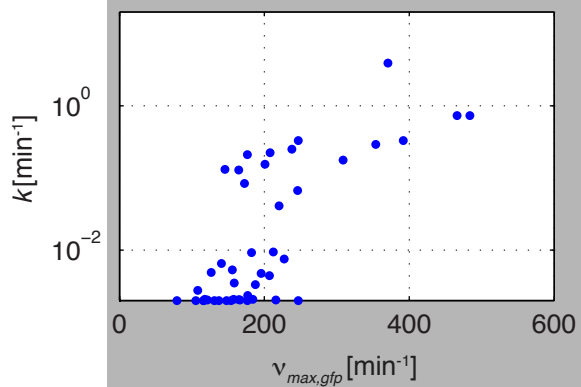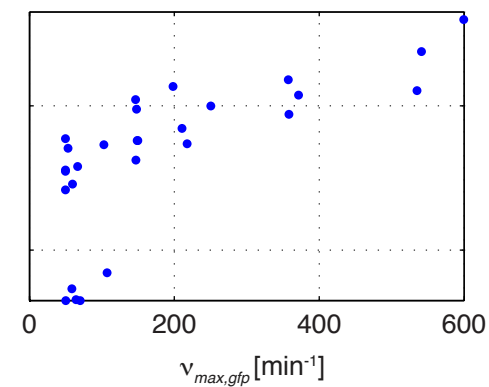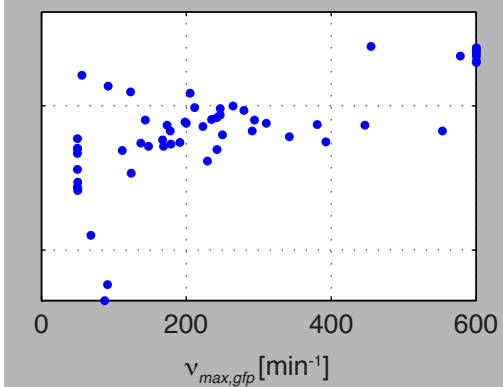

Supplement: pone.0089532.s014.pdf [file pone.0089532.s014.pdf]
